# Supplementary material
Source: publisher site journal article supplement (https://www.dovepress.com/article/383138)
Supplement: Supplementary file 1 [file get_supplementary_file.php]

# Supplementary materials

**Supplementary Text 1.** Supplementary methods

*Ethics*

For both NEF-101 and NEF-105 studies, the study protocol, and participant information and consent forms were reviewed and approved by an Independent Ethics Committee (IEC) prior to inclusion of participants. The protocol for NEF-101 was also reviewed and approved by the Swedish Medicinal Products Agency (MPA).

The studies were conducted in compliance with the protocol, regulatory requirements, good clinical practice, and the ethical principles of the Declaration of Helsinki.

All participants received written and verbal information regarding the studies, were given the opportunity to ask questions about the study and signed the informed consent form prior to commencing the studies.

*Pharmacokinetic methods*

In both the NEF-101 and NEF-105 studies, budesonide pharmacokinetic parameters were assessed using non-compartmental methods and actual time points of plasma sampling. Concentrations below the limit of quantitation (LOQ) that appeared before the maximum plasma concentration (Cmax) were treated as zero. Concentrations below LOQ after Cmax were omitted from the analysis.

The following pharmacokinetic parameters were determined:

- Cmax
- Time to maximum plasma concentration (tmax)
- Lag time from administration to start of absorption (tlag)
- Half-life (t1/2)
- Area under the plasma concentration–time curve over 24 hours (AUC0–24)
- AUC from time 0 to infinity (AUC0–inf); NEF-105 only

Cmax and tmax were derived from the observed plasma concentration data. The AUC parameters were calculated using linear trapezoidal interpolation. For AUC0–24, the area was calculated from the last point showing a measurable plasma concentration and, when necessary, extrapolated to 24 hours using the estimated concentration in the last quantifiable sample and lambda z. If the end time of the area interval occurred within the range of the data but did not coincide with an observed data point, then a linear interpolation was performed to estimate the corresponding concentration. AUC0–inf was calculated using extrapolation from the time of the last measurable concentration to infinity based on the assessment of lambda z, which was the first-order rate constant associated with the terminal portion of the curve. Lambda z was estimated via linear regression of time versus logarithmic concentration.

*NEF-101*

In the open-label NEF-101 study, Nefecon® 8 mg, Nefecon 16 mg, and Entocort® 9 mg were administered as single doses in a randomized order to healthy participants in a 3-way crossover study with a washout period between treatments of at least 7 days. The primary objective of the study was to compare the individual changes from untreated conditions in serum cortisol levels over 24 hours. This objective included two parts: firstly, to compare the three treatments with regard to change in AUC0–24 for serum cortisol; and secondly, to find the dose of Nefecon that corresponded to a single 9 mg dose of Entocort® with regard to effects on AUC0–24 for serum cortisol. Secondary objectives were to compare cortisol excretion in urine over 24 hours, the pharmacokinetic parameters for plasma concentrations of budesonide, and to find the dose of Nefecon that corresponded to a single 9 mg dose of Entocort® with regard to budesonide AUC0–24.

A screening visit took place within 21 days prior to the first dosing period, and participants received standardized meals in the two days preceding the first dose (and only one day preceding the second and third doses). Participants were administered Nefecon 8 mg, Nefecon 16 mg, and Entocort® 9 mg in the fasting state in the morning, and were served breakfast 60 (+15) minutes after dosing. Serum cortisol was measured frequently over 24 hours before the first dose and after each dose administration. Quantitative cortisol excretion in urine was measured on the same occasions over the 24h sampling periods. Budesonide plasma concentrations were followed over 24 hours after each dose.

Serum cortisol was analyzed by immunoassay with electrochemical luminescence (Roche Diagnostics). The coefficient of variation (CV) was 4.1% at 74 nmol/L, 2.5% at 544 nmol/L, and 2.1% at 855 nmol/L. The LOQ was 15 nmol/L and concentrations below LOQ were set to half this value (i.e. 7.5 nmol/L), to represent the most likely values at these time points. Concentrations below LOQ were all observed in the time interval 12h–21h after the start of sampling and occurred in at least one sample in 1 profile at baseline, 9 profiles with Nefecon 8 mg, 17 profiles with Nefecon 16 mg, and 14 profiles with Entocort® 9 mg.

Urine cortisol samples were analyzed with high-performance liquid chromatography followed by liquid chromatography–tandem mass spectrometry (LCMS/MS). The CV was 10.5% at 18 nmol/L, 5.9% at 61 nmol/L, and 8.2% at 121 nmol/L; the LOQ was 5 nmol/L.

Budesonide plasma samples were analyzed with LCMS/MS. The LOQ was 50 pg/mL and the limit of detection was 25 pg/mL. The CV was 14% at 50 pg/mL, 7.5% at 200 pg/mL, 5.0% at 2000 pg/mL, and 4.8% at 10,000 pg/mL.

In total, 24 participants were randomized and 23 completed the study. One participant discontinued after two treatments for personal reasons and did not receive the Nefecon 8 mg dose. The analyses of the serum and urine cortisol parameters were based on the full analysis set, including all participants who provided sufficient serum cortisol data for the analysis of the pre-planned serum cortisol parameters for at least two treatment periods. However, for the dose of Nefecon corresponding to 9 mg Entocort®, data from all three periods were required for a participant to be included in the analysis. The analyses of plasma budesonide concentration data were based on the pharmacokinetic analysis set, which included all participants who provided sufficient plasma concentration data for the analysis of the pre-planned pharmacokinetic parameters for at least two treatment periods.

With regard to statistical analyses of serum and urine cortisol data, p-values should be regarded as descriptive because no adjustment for multiplicity was made. No other adjustments for covariates were made. Change from baseline in log-transformed AUC0–24 for serum and urine cortisol, as well as plasma budesonide AUC0–24, Cmax, and t1/2 were analyzed using an analysis of variance (ANOVA) designed for the crossover design to test for treatment differences. The model consisted of fixed effects for treatment, period, and subject. p-values were derived for all pairwise treatment differences; hence, comparisons were made between the two Nefecon doses as well as between each Nefecon dose and Entocort®. 95% confidence intervals (CIs) were derived based on least squares means and were back-transformed to the original scale. A difference of treatment means of log-transformed data corresponded to a ratio of geometric means of the original data. As an alternative to the ANOVA, a non-parametric test method that is more robust to departure from the normality assumption was used to check the validity of the results. To be able to find the dose of Nefecon that corresponded to Entocort® 9 mg, an assumption of the relationship between AUC0–24 and dose was made. An analysis of covariance (ANCOVA) model was used in this study to fit a dose-response curve for the change from baseline in AUC0–24 forserum cortisol and for the change from baseline in log-transformed AUC0–24 for plasma budesonide. Subject, treatment period, and drug were used as factors and log-transformed dose was used as a covariate. Two distinct regression analyses of the dose-response curve were then used to determine dose equivalence.

*NEF-105*

The open-label NEF-105 study compared the pharmacokinetic properties of Nefecon-A and Nefecon-F and Entocort® in healthy participants. It was conducted according to a randomized cross-over repeated dosing design with two administrations each of Nefecon-A and Nefecon-F 16 mg and one administration of Entocort® 9 mg. Nefecon-A was the formulation used in Phase II studies, while Nefecon-F was the formulation used from the Phase III studies onward.

Of 25 enrolled participants, 22 completed all dosing periods. Nefecon dosing was repeated in patients available on follow-up, providing a total of 47 evaluable pharmacokinetic profiles for each formulation of Nefecon and 23 profiles for Entocort®. There was a washout period of 7–14 days between each dose. On all dosing occasions, participants fasted overnight for at least 10 hours and did not receive any food until 4 hours after drug administration. All evaluable profiles were included in the descriptive statistics of pharmacokinetic parameters and in the bioequivalence evaluations.

Pharmacokinetic sampling started at 1 hour postdose for Nefecon and at 20 minutes postdose for Entocort® to account for the earlier start of drug release from Entocort®, and was continued for 24 hours postdose.

The majority of pharmacokinetic analyses were based on the pharmacokinetic analysis set, consisting of participants who had sufficient plasma concentration data from at least one dose of the investigational product. The assessment of intra-individual CV of Nefecon-A and Nefecon-F included data from patients who received at least two doses of either Nefecon-A or Nefecon-F only and had sufficient plasma concentration-time data to permit reliable calculation of at least one of the key pharmacokinetic endpoints (C­max or AUC).

For pharmacokinetic concentration and AUC data, the “Nefecon-A average” and “Nefecon-F average” values were the geometric means of the values from each individual dose of Nefecon-A or Nefecon-F, respectively, for a given participant. For t1/2, harmonic means were used. If data were not available for both doses for a given participant, the available concentration was used. The LOQ for budesonide was 10 pg/mL.

The intra-individual (inter-occasion) variability in AUC0–24, AUC0–inf, and Cmax for Nefecon-A and Nefecon-F were calculated according to the Food and Drug Administration (FDA) Draft Guidance on Progesterone, 2011. The AUC0–24, AUC0–inf, and Cmax for the two Nefecon formulations and Entocort® were logarithm transformed prior to analysis. Two different analysis approaches were performed. In the first approach, the average approach, “Nefecon-A average” and “Nefecon-F average” values were analyzed using a mixed-model ANOVA with fixed-effect terms for treatment arm, treatment period, and treatment sequence, and subject within sequence as a random effect, where period corresponds to the first period at which a given formulation was administered. In the second approach, the individual approach, the individual Cmax and AUCs were analyzed in a single model without averaging data prior to analysis according to the mixed-model described in the FDA Draft Guidance on Progesterone, 2011.

Sensitivity analyses were performed that included only those participants who completed all five periods and excluded Entocort® in case its variability was different than the two Nefecon formulations. An exploratory sensitivity analysis was performed using the data excluding the outliers, if applicable. The estimated least-square mean differences corresponding to the contrasts between the test formulations and the reference were calculated together with the associated 90% 2-sided CI. Furthermore, the estimated contrasts and their CIs were back-transformed to the ratio scale. Terminal elimination t1/2 was compared without any transformation between the test products and reference product using the same mixed-model. The estimated least-square mean differences corresponding to the contrasts were calculated together with the associated 90% 2-sided CI.

**Figure S1** Geometric mean S-cortisol concentration over time in the NEF-101 study. Time 0 occurred at the same clock time in the morning for each participant and represents time of drug intake during dosing days.S-cortisol, serum cortisol.

**Figure S2** Change from baseline in geometric mean S-cortisol concentration over time in the NEF-101 study**.** S-cortisol, serum cortisol.

| **Parameter** | **Nefecon** | **Entocort®** |
| --- | --- | --- |
| Imax | 81 | 108 |
| IC50 | 1733 | 1669 |
| E0 | 29 | 50 |
| Imax–E0 | 52 | 59 |

**Figure S3** Change in S-cortisol from baseline over 24 hours versus budesonide AUC0–24 in the NEF-101 study. AUC0–24, area under the plasma concentration–time curve over 24 hours; E0, baseline effect; IC50, half-maximal inhibitory concentration; Imax, maximum inhibition; S-cortisol, serum cortisol.

| **Parameter** | **Nefecon** | **Entocort®** |
| --- | --- | --- |
| Imax | 176 | 229 |
| IC50 | 1142 | 1254 |
| E0 | 116 | 150 |
| Imax–E0 | 60 | 79 |

**Figure S4** Change in U-cortisol from baseline over 24 hours vs budesonide AUC0–24 in the NEF-101 study**.** AUC0–24, area under the plasma concentration–time curve over 24 hours; E0, baseline effect; IC50, half-maximal inhibitory concentration; Imax, maximum inhibition; U-cortisol, urine cortisol.

**Figure S5** Linear regression of log budesonide Cmax vs log AUC0–24 in the NEF-101 study. AUC0–24, area under the plasma concentration–time curve over 24 hours; Cmax, maximum plasma concentration.
